# Supplementary material for: Effectiveness of the HEAR-Aware App for Adults Not Ready for Hearing Aids, but Open to Self-Management Support: Results of a Randomized Controlled Trial
Source: PubMed Central journal article supplement (PMC11487041; doi:10.1097/aud.0000000000001533), 2024-06-04

## Supplemental Digital Content (SDC)

SDC Figure 1: A selection of screenshots of the HEAR-aware app

Screenshot 1

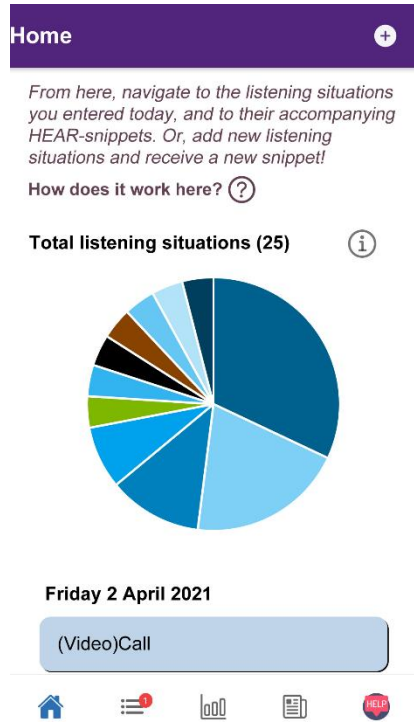

Screenshot 2

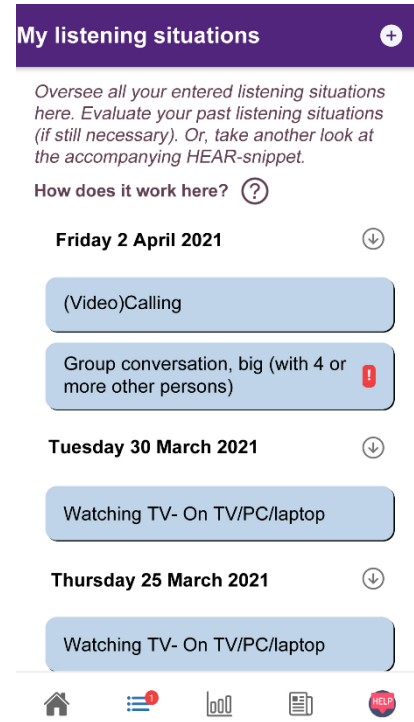

Screenshot 3

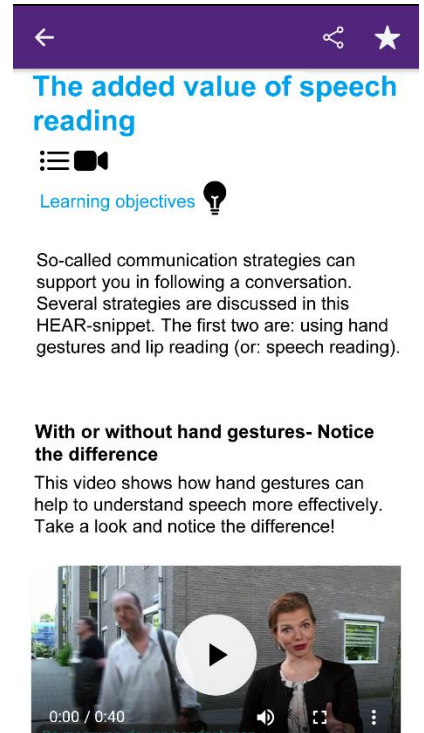

Supplement: aud-45-1502-s001.pdf [file aud-45-1502-s001.pdf]
