# Supplementary material for: Effectiveness of the HEAR-Aware App for Adults Not Ready for Hearing Aids, but Open to Self-Management Support: Results of a Randomized Controlled Trial
Source: PubMed Central journal article supplement (PMC11487041; doi:10.1097/aud.0000000000001533), 2024-06-04
Supplement: aud-45-1502-s002.pdf [file aud-45-1502-s002.pdf]

## Supplemental Digital Content (SDC)

**SDC Table 1: Overview of all questionnaires and time points at which they were administered.**

|                                         | Pre-intervention<br>questionnaire (T0)<br>Intervention & Control<br>Group | Post-intervention<br>questionnaire 1 (T1)<br>Control Group | Post-intervention<br>questionnaire 1 (T1)<br>Intervention Group | Post-intervention<br>questionnaire 2 (T2)<br>Control Group | Post-intervention<br>questionnaire 2 (T2)<br>Control Group |
|-----------------------------------------|---------------------------------------------------------------------------|------------------------------------------------------------|-----------------------------------------------------------------|------------------------------------------------------------|------------------------------------------------------------|
| Demographics                            | X                                                                         |                                                            |                                                                 |                                                            |                                                            |
| The Line                                | X                                                                         | X                                                          | X                                                               | X                                                          | X                                                          |
| Staging Algorithm                       | X                                                                         | X                                                          | X                                                               | X                                                          | X                                                          |
| AIADH                                   | X                                                                         | X                                                          | X                                                               | X                                                          | X                                                          |
| CPHI                                    | X                                                                         | X                                                          | X                                                               | X                                                          | X                                                          |
| PHS                                     | X                                                                         | X                                                          | X                                                               | X                                                          | X                                                          |
| AQ                                      | X                                                                         | X                                                          | X                                                               | X                                                          | X                                                          |
| SEHHS                                   | X                                                                         | X                                                          | X                                                               | X                                                          | X                                                          |
| PHHSS                                   | X                                                                         | X                                                          | X                                                               | X                                                          | X                                                          |
| SUS                                     |                                                                           |                                                            | X                                                               |                                                            |                                                            |
| IMI                                     |                                                                           |                                                            | X                                                               |                                                            |                                                            |
| IOI-AI item 4<br>Recommendation<br>item |                                                                           |                                                            | X                                                               |                                                            | X                                                          |
|                                         |                                                                           |                                                            | X                                                               |                                                            |                                                            |

AIADH = Amsterdam Inventory for Auditory Disability and Handicap, AQ = Attitude Questionnaire, CPHI = Communication Profile for the Hearing Impaired, IMI = Intrinsic Motivation Inventory (Value/Usefulness subscale), IOI-AI = International Outcome Inventory-Alternative Intervention, PHHSS = Prior Hearing Help-Seeking Steps, PHS = Partners in Health Scale, Recommendation item = ‘How likely is it that you would recommend the app to other people (family, friends, colleagues)?’, SEHHS = Self-Efficacy for Hearing Help-Seeking Scale, SUS = System Usability Scale,
