# Supplementary material for: Effectiveness of the HEAR-Aware App for Adults Not Ready for Hearing Aids, but Open to Self-Management Support: Results of a Randomized Controlled Trial
Source: PubMed Central journal article supplement (PMC11487041; doi:10.1097/aud.0000000000001533), 2024-06-04
Supplement: aud-45-1502-s003.pdf [file aud-45-1502-s003.pdf]

## Supplemental Digital Content (SDC)

SDC Table 2. The frequency of different types of listening situations reported by the participants in the intervention group (those who utilized the HEAR-aware app).

| Type of Listening Situation                                         | Number of Listening Situations Added (Frequency) | Percentage of Listening Situations Entered (Top-5 Indicated in Bold) |
|---------------------------------------------------------------------|--------------------------------------------------|----------------------------------------------------------------------|
| <b>1. 1-on-1 conversation</b>                                       | 149                                              | <b>18.3</b>                                                          |
| <b>2. Group conversation, small (with 2-3 others)</b>               | 126                                              | <b>15.5</b>                                                          |
| <b>3. Watching TV – On TV/PC/laptop</b>                             | 119                                              | <b>14.6</b>                                                          |
| <b>4. Group conversation, big (with <math>\geq</math> 4 others)</b> | 84                                               | <b>10.3</b>                                                          |
| <b>5. (Video)calling</b>                                            | 62                                               | <b>7.6</b>                                                           |
| 6. Driving car                                                      | 44                                               | 5.4                                                                  |
| 7. Music                                                            | 33                                               | 4.0                                                                  |
| 8. Walking                                                          | 31                                               | 3.8                                                                  |
| 9. Cycling                                                          | 30                                               | 3.7                                                                  |
| 10. Listening to nature sounds (e.g., birds, sea)                   | 29                                               | 3.6                                                                  |
| 11. Lecture/ presentation                                           | 29                                               | 3.6                                                                  |
| 12. Sports instruction                                              | 16                                               | 2.0                                                                  |
| 13. Watching clips – On smartphone                                  | 12                                               | 1.5                                                                  |
| 14. Radio interview / podcast / audiobook                           | 14                                               | 1.7                                                                  |
| 15. Using public transport                                          | 7                                                | .9                                                                   |
| Other                                                               | 30                                               | 3.7                                                                  |
| <b>Total</b>                                                        | <b>815</b>                                       | <b>100.0</b>                                                         |
