# Supplementary material for: Effectiveness of the HEAR-Aware App for Adults Not Ready for Hearing Aids, but Open to Self-Management Support: Results of a Randomized Controlled Trial
Source: PubMed Central journal article supplement (PMC11487041; doi:10.1097/aud.0000000000001533), 2024-06-04
Supplement: aud-45-1502-s004.pdf [file aud-45-1502-s004.pdf]

## Supplemental Digital Content (SDC)

SDC Table 3. Baseline comparison of outcome measures. Values indicate the mean (and SD) of the outcomes unless stated otherwise. Significant effects are indicated in bold.

| Baseline characteristics                             |                |                    |                  |
|------------------------------------------------------|----------------|--------------------|------------------|
| Outcome measures                                     | Control (n=45) | Intervention(n=42) | p-value          |
| <b>Primary outcome measure</b>                       |                |                    |                  |
| The Line Composite                                   | 5.2 (2.1)      | 5.2 (2.1)          | .95 <sup>a</sup> |
| <b>Secondary outcome measures</b>                    |                |                    |                  |
| <b>The Line</b>                                      |                |                    |                  |
| The Line Communication Strategies                    | 5.7 (2.6)      | 5.6 (2.6)          | .89 <sup>a</sup> |
| The Line Emotional Coping                            | 5.1 (2.8)      | 5.1 (2.9)          | .94 <sup>a</sup> |
| The Line Social Support                              | 5.2 (2.8)      | 5.5(2.7)           | .57 <sup>a</sup> |
| The Line Hearing Aids                                | 5.3 (2.6)      | 5.5 (2.5)          | .82 <sup>a</sup> |
| The Line Assistive Listening Devices                 | 4.5 (2.7)      | 4.2 (2.7)          | .62 <sup>a</sup> |
| The Line Generic                                     | 6.2 (2.2)      | 6.7 (2.0)          | .25 <sup>a</sup> |
| <b>Staging Algorithm. Count (%)</b>                  |                |                    |                  |
| <b>Staging Algorithm Generic</b>                     |                |                    | .55 <sup>c</sup> |
| Precontemplation                                     | 2 (4.7%)       | 0 (0%)             |                  |
| Contemplation                                        | 23 (53.5%)     | 23 (54.8%)         |                  |
| Preparation                                          | 14 (32.6%)     | 14 (33.3%)         |                  |
| Action                                               | 4 (9.3%)       | 5 (11.9%)          |                  |
| <b>Staging Algorithm Communication Strategies</b>    |                |                    | .37 <sup>c</sup> |
| Precontemplation                                     | 16 (37.2%)     | 13 (31.0%)         |                  |
| Contemplation                                        | 10 (23.3%)     | 13 (31.0%)         |                  |
| Preparation                                          | 11 (25.6%)     | 6 (14.3%)          |                  |
| Action                                               | 6 (14.0%)      | 10 (23.8%)         |                  |
| <b>Staging Algorithm Emotional Coping</b>            |                |                    | .30 <sup>c</sup> |
| Precontemplation                                     | 29 (67.4%)     | 22 (52.4%)         |                  |
| Contemplation                                        | 4 (9.3%)       | 6 (14.3%)          |                  |
| Preparation                                          | 7 (16.3%)      | 6 (14.3%)          |                  |
| Action                                               | 3 (7.0%)       | 8 (19.0%)          |                  |
| <b>Staging Algorithm Social Support</b>              |                |                    | .13 <sup>c</sup> |
| Precontemplation                                     | 23 (53.5%)     | 18 (42.9%)         |                  |
| Contemplation                                        | 10 (23.3%)     | 9 (21.4%)          |                  |
| Preparation                                          | 6 (14.0%)      | 3 (7.1%)           |                  |
| Action                                               | 4 (9.3%)       | 12 (28.6%)         |                  |
| <b>Staging Algorithm Hearing Aids</b>                |                |                    | .44 <sup>c</sup> |
| Precontemplation                                     | 7 (16.3%)      | 5 (11.9%)          |                  |
| Contemplation                                        | 26 (60.5%)     | 23 (54.8%)         |                  |
| Preparation                                          | 10 (23.3%)     | 12 (28.6%)         |                  |
| Action                                               | 0 (0.0%)       | 2 (4.8%)           |                  |
| <b>Staging Algorithm Assistive Listening Devices</b> |                |                    | .40 <sup>c</sup> |
| Precontemplation                                     | 15 (34.9%)     | 19 (45.2%)         |                  |
| Contemplation                                        | 17 (39.5%)     | 16 (38.1%)         |                  |
| Preparation                                          | 11 (25.6%)     | 6 (14.3%)          |                  |
| Action                                               | 0 (0.0%)       | 1 (2.4%)           |                  |
| <b>PHS</b>                                           |                |                    |                  |
| PHS Total                                            | 6.0 (1.3)      | 5.9 (1.3)          | .78 <sup>a</sup> |
| PHS Knowledge                                        | 5.4 (1.6)      | 5.4 (1.6)          | .84 <sup>a</sup> |
| PHS Symptoms                                         | 5.8 (2.0)      | 5.5 (2.0)          | .56 <sup>a</sup> |
| PHS Coping                                           | 6.7 (1.4)      | 6.7 (1.4)          | .89 <sup>a</sup> |
| <b>AIADH</b>                                         |                |                    |                  |
| AIADH Total                                          | 0.7 (0.5)      | 0.7 (0.4)          | .79 <sup>a</sup> |
| AIADH Distinction of Sounds                          | 0.5 (0.4)      | 0.4 (0.4)          | .54 <sup>a</sup> |
| AIADH Auditory Localization                          | 0.7 (0.6)      | 0.7 (0.7)          | .81 <sup>a</sup> |

|                                                                |                    |                   |                  |
|----------------------------------------------------------------|--------------------|-------------------|------------------|
| AIADH Intelligibility in Noise                                 | 1.2 (0.6)          | 1.3 (0.5)         | .24 <sup>a</sup> |
| AIADH Intelligibility in Quiet                                 | 0.8 (0.6)          | 0.9 (0.4)         | .39 <sup>a</sup> |
| AIADH Detection of Sounds                                      | 0.6 (0.5)          | 0.5 (0.4)         | .65 <sup>a</sup> |
| CPHI                                                           |                    |                   |                  |
| CPHI Maladaptive Behaviors                                     | 4.6 (0.4)          | 4.7 (0.3)         | .29 <sup>a</sup> |
| CPHI Verbal Strategies                                         | 2.3 (0.8)          | 2.2 (0.6)         | .77 <sup>a</sup> |
| CPHI Non-Verbal Strategies                                     | 2.9 (1.0)          | 3.0 (0.9)         | .88 <sup>a</sup> |
| CPHI Self-Acceptance                                           | 4.4 (0.7)          | 4.5 (0.6)         | .54 <sup>a</sup> |
| CPHI Stress and Withdrawal                                     | 4.0 (0.7)          | 4.1 (0.6)         | .38 <sup>a</sup> |
| AQ                                                             |                    |                   |                  |
| AQ Benefits of Hearing Aids                                    | 3.6 (0.5)          | 3.7 (0.6)         | .68 <sup>a</sup> |
| AQ Hearing Loss Stigma                                         | 2.2 (0.9)          | 2.5 (0.9)         | .18 <sup>a</sup> |
| AQ Social Pressure and Support                                 | 3.0 (0.9)          | 3.1 (0.7)         | .65 <sup>a</sup> |
| AQ Evaluation of Hearing Aids by Others                        | 2.4 (0.7)          | 2.3 (0.7)         | .44 <sup>a</sup> |
| SEHHS. Median (25 <sup>th</sup> – 75 <sup>th</sup> percentile) |                    |                   |                  |
| Self efficacy for hearing help seeking total                   | 85.0 (70.0 – 95.3) | 92.5 (79.3 –98.6) | .11 <sup>b</sup> |
| PHHSS. Count (%)                                               |                    |                   |                  |
| Selftest Yes                                                   | 10 (22.2%)         | 11 (26.2%)        | .67 <sup>c</sup> |

<sup>a</sup> Independent Samples Test, <sup>b</sup> Mann-Whitney test, <sup>c</sup> Chisquare test.

Abbreviations: AIADH = Amsterdam Inventory for Auditory Disability and Handicap, AQ = Attitude Questionnaire, CPHI = Communication Profile for the Hearing Impaired, PHHSS = Prior Hearing Help-Seeking Steps, PHS = Partners in Health Scale, SEHHS = Self-Efficacy for Hearing Help-Seeking Scale,

SDC Table 4. Effectiveness results for the primary and secondary outcomes (per-protocol analyses).

Significant effects are indicated in bold.

| Outcomes                                   | Group        | T0 |           | T1 |           | T2 |           | LMM <sup>a</sup> |
|--------------------------------------------|--------------|----|-----------|----|-----------|----|-----------|------------------|
|                                            |              | n  | Mean (SD) | n  | Mean (SD) | n  | Mean (SD) |                  |
| The Line Composite                         | Control      | 43 | 5.2 (2.1) | 38 | 4.6 (2.0) | 39 | 5.0 (2.4) | .23              |
|                                            | Per Protocol | 21 | 5.1 (2.0) | 21 | 5.4 (1.9) | 21 | 5.4 (1.7) |                  |
| The Line Communication Strategies          | Control      | 43 | 5.7 (2.6) | 38 | 4.9 (2.9) | 39 | 5.2 (3.0) | .13              |
|                                            | Per Protocol | 21 | 5.7 (2.6) | 21 | 6.3 (2.6) | 21 | 5.9 (2.6) |                  |
| The Line Emotional Coping                  | Control      | 43 | 5.1 (2.8) | 38 | 4.4 (2.9) | 39 | 4.6 (3.3) | .11              |
|                                            | Per Protocol | 21 | 5.2 (2.7) | 21 | 6.2 (2.6) | 21 | 5.2 (2.9) |                  |
| The Line Social Support                    | Control      | 43 | 5.2 (2.8) | 38 | 4.7 (2.9) | 39 | 4.9 (3.2) | .90              |
|                                            | Per Protocol | 21 | 5.5 (2.5) | 21 | 5.3 (3.0) | 21 | 5.6 (2.8) |                  |
| The Line Hearing Aids                      | Control      | 43 | 5.3 (2.7) | 38 | 5.4 (3.1) | 39 | 6.3 (3.0) | .26              |
|                                            | Per Protocol | 21 | 5.3 (2.6) | 21 | 5.4 (3.3) | 21 | 5.3 (2.5) |                  |
| The Line Assistive Listening Devices       | Control      | 43 | 4.5 (2.7) | 38 | 3.6 (3.1) | 39 | 4.0 (3.2) | <b>.049</b>      |
|                                            | Per Protocol | 21 | 3.7 (2.8) | 21 | 4.0 (2.6) | 21 | 5.0 (2.3) |                  |
| The Line Generic                           | Control      | 43 | 6.2 (2.2) | 38 | 6.0 (2.1) | 40 | 6.6 (2.2) | .13              |
|                                            | Per Protocol | 21 | 6.8 (2.0) | 21 | 6.3 (1.9) | 21 | 6.2 (1.7) |                  |
| Staging Algorithm Generic                  | Control      | 43 | 1.5 (0.7) | 38 | 1.5 (0.7) | 40 | 1.7 (0.9) | .37              |
|                                            | Per Protocol | 21 | 1.6 (0.8) | 21 | 1.7 (0.8) | 21 | 1.6 (0.7) |                  |
| Staging Algorithm Communication Strategies | Control      | 43 | 1.2 (1.1) | 38 | 1.1 (1.2) | 39 | 1.0 (1.1) | .80              |
|                                            | Per Protocol | 21 | 1.9 (1.0) | 21 | 1.7 (1.3) | 21 | 1.7 (1.2) |                  |
| Staging Algorithm Emotional Coping         | Control      | 43 | 0.6 (1.0) | 38 | 0.5 (0.9) | 39 | 0.9 (1.2) | .26              |
|                                            | Per Protocol | 21 | 1.0 (1.2) | 21 | 1.2 (1.3) | 21 | 1.1 (1.3) |                  |
| Staging Algorithm Social Support           | Control      | 43 | 0.8 (1.0) | 38 | 0.8 (1.1) | 39 | 1.2 (1.3) | .55              |
|                                            | Per Protocol | 21 | 1.5 (1.3) | 21 | 1.5 (1.3) | 21 | 1.5 (1.3) |                  |
| Staging Algorithm Hearing Aids             | Control      | 43 | 1.1 (0.6) | 38 | 1.3 (0.8) | 39 | 1.5 (0.9) | <b>.049</b>      |
|                                            | Per Protocol | 21 | 1.3 (0.7) | 21 | 1.2 (0.8) | 21 | 1.1 (0.9) |                  |

|                                               |              |    |             |    |             |    |             |            |
|-----------------------------------------------|--------------|----|-------------|----|-------------|----|-------------|------------|
| Staging Algorithm Assistive Listening Devices | Control      | 43 | 0.9 (0.8)   | 38 | 0.7 (0.8)   | 39 | 0.6 (0.8)   | .38        |
|                                               | Per Protocol | 21 | 0.7 (0.7)   | 21 | 0.8 (0.6)   | 21 | 0.7 (0.7)   |            |
| PHS Self Management total                     | Control      | 43 | 6.0 (1.3)   | 38 | 6.1 (1.2)   | 39 | 6.3 (1.3)   | .47        |
|                                               | Per Protocol | 21 | 6.1 (1.1)   | 21 | 6.6 (0.9)   | 21 | 6.8 (0.8)   |            |
| PHS Knowledge                                 | Control      | 43 | 5.4 (1.6)   | 38 | 5.5 (1.7)   | 39 | 5.9 (1.4)   | .44        |
|                                               | Per Protocol | 21 | 5.5 (1.5)   | 21 | 6.1 (1.1)   | 21 | 6.5 (1.1)   |            |
| PHS Management of Symptoms                    | Control      | 43 | 5.8 (2.0)   | 38 | 6.0 (1.9)   | 39 | 6.3 (1.8)   | .79        |
|                                               | Per Protocol | 21 | 6.0 (1.8)   | 21 | 6.5 (1.6)   | 21 | 6.9 (1.1)   |            |
| PHS Coping                                    | Control      | 43 | 6.7 (1.4)   | 38 | 6.9 (1.3)   | 39 | 6.6 (1.7)   | .74        |
|                                               | Per Protocol | 21 | 7.0 (1.2)   | 21 | 7.2 (0.8)   | 21 | 7.1 (1.1)   |            |
| CPHI Maladaptive behaviors                    | Control      | 44 | 4.6 (0.4)   | 40 | 4.6 (0.4)   | 40 | 4.6 (0.4)   | .78        |
|                                               | Per Protocol | 21 | 4.7 (0.3)   | 21 | 4.6 (0.3)   | 21 | 4.6 (0.3)   |            |
| CPHI Verbal Strategies                        | Control      | 44 | 2.3 (0.8)   | 40 | 2.3 (0.9)   | 40 | 2.3 (0.8)   | <b>.03</b> |
|                                               | Per Protocol | 21 | 2.2 (0.5)   | 21 | 2.0 (0.4)   | 21 | 2.4 (0.7)   |            |
| CPHI Non-Verbal Strategies                    | Control      | 44 | 2.9 (1.0)   | 40 | 3.0 (1.0)   | 40 | 3.0 (0.9)   | .45        |
|                                               | Per Protocol | 21 | 3.1 (0.7)   | 21 | 2.9 (0.7)   | 21 | 3.1 (0.7)   |            |
| CPHI Self-Acceptance                          | Control      | 44 | 4.4 (0.7)   | 40 | 4.4 (0.6)   | 40 | 4.5 (0.5)   | .54        |
|                                               | Per Protocol | 21 | 4.5 (0.7)   | 21 | 4.6 (0.5)   | 21 | 4.5 (0.7)   |            |
| CPHI Stress and Withdrawal                    | Control      | 44 | 4.0 (0.7)   | 39 | 4.1 (0.6)   | 40 | 4.0 (0.8)   | .72        |
|                                               | Per Protocol | 21 | 4.1 (0.5)   | 21 | 4.2 (0.6)   | 21 | 4.1 (0.6)   |            |
| SEHHS Self efficacy for hearing help seeking  | Control      | 43 | 82.1 (17.2) | 38 | 83.2 (13.4) | 39 | 85.7 (10.0) | .52        |
|                                               | Per Protocol | 21 | 88.2 (15.3) | 21 | 86.2 (13.5) | 21 | 88.5 (13.4) |            |
| AQ Benefits                                   | Control      | 43 | 3.6 (0.5)   | 38 | 3.6 (0.4)   | 40 | 3.6 (0.5)   | .07        |
|                                               | Per Protocol | 21 | 3.7 (0.6)   | 21 | 3.5 (0.5)   | 21 | 3.4 (0.5)   |            |
| AQ Stigma                                     | Control      | 43 | 2.2 (0.9)   | 38 | 2.2 (0.8)   | 40 | 2.2 (0.7)   | .66        |
|                                               | Per Protocol | 21 | 2.5 (0.8)   | 21 | 2.4 (0.8)   | 21 | 2.3 (0.8)   |            |
| AQ Social Pressure                            | Control      | 43 | 3.0 (0.9)   | 38 | 3.0 (0.9)   | 40 | 3.1 (0.9)   | .08        |
|                                               | Per Protocol | 21 | 3.0 (0.7)   | 21 | 2.8 (0.7)   | 21 | 2.8 (0.8)   |            |
| AQ Evaluation of Hearing Aids by Others       | Control      | 43 | 2.4 (0.7)   | 38 | 2.3 (0.5)   | 40 | 2.3 (0.6)   | .28        |
|                                               | Per Protocol | 21 | 2.3 (0.8)   | 21 | 2.1 (0.7)   | 21 | 2.3 (0.9)   |            |
| AIADH Total                                   | Control      | 44 | 0.7 (0.5)   | 40 | 0.6 (0.4)   | 41 | 0.7 (0.5)   | .35        |
|                                               | Per Protocol | 21 | 0.7 (0.3)   | 21 | 0.7 (0.3)   | 21 | 0.7 (0.4)   |            |
| AIADH Distinction of Sounds                   | Control      | 44 | 0.5 (0.4)   | 40 | 0.4 (0.4)   | 41 | 0.5 (0.5)   | .53        |
|                                               | Per Protocol | 21 | 0.3 (0.3)   | 21 | 0.4 (0.3)   | 21 | 0.5 (0.5)   |            |
| AIADH Auditory Localization                   | Control      | 44 | 0.7 (0.6)   | 40 | 0.6 (0.6)   | 41 | 0.7 (0.6)   | .80        |
|                                               | Per Protocol | 21 | 0.6 (0.5)   | 21 | 0.6 (0.5)   | 21 | 0.6 (0.5)   |            |
| AIADH Intelligibility in Noise                | Control      | 44 | 1.2 (0.6)   | 40 | 1.1 (0.6)   | 41 | 1.2 (0.7)   | .05        |
|                                               | Per Protocol | 21 | 1.2 (0.5)   | 21 | 1.2 (0.5)   | 21 | 1.1 (0.5)   |            |
| AIADH Intelligibility in Quiet                | Control      | 44 | 0.8 (0.6)   | 40 | 0.8 (0.6)   | 41 | 0.8 (0.5)   | .18        |
|                                               | Per Protocol | 21 | 0.9 (0.4)   | 21 | 0.8 (0.3)   | 21 | 0.8 (0.5)   |            |
| AIADH Detection of Sounds                     | Control      | 44 | 0.6 (0.5)   | 40 | 0.5 (0.4)   | 41 | 0.6 (0.5)   | .11        |
|                                               | Per Protocol | 21 | 0.5 (0.3)   | 21 | 0.6 (0.3)   | 21 | 0.5 (0.3)   |            |

<sup>a</sup> p-value of the interaction between time and group.

SD = Standard deviation, LMM = Linear Mixed Model. AIADH = Amsterdam Inventory for Auditory Disability and Handicap, AQ = Attitude Questionnaire, CPHI = Communication Profile for the Hearing Impaired, PHSS = Prior Hearing Help-Seeking Steps, PHS = Partners in Health Scale, SEHHS = Self-Efficacy for Hearing Help-Seeking Scale,
