# Supplementary material for: Effectiveness of the HEAR-Aware App for Adults Not Ready for Hearing Aids, but Open to Self-Management Support: Results of a Randomized Controlled Trial
Source: PubMed Central journal article supplement (PMC11487041; doi:10.1097/aud.0000000000001533), 2024-06-04
Supplement: aud-45-1502-s005.pdf [file aud-45-1502-s005.pdf]

SDC Table 4. Effectiveness results for the primary and secondary outcomes (per-protocol analyses).

Significant effects are indicated in bold.

| Outcomes                                      | Group        | T0 |           | T1 |           | T2 |           | LMM <sup>a</sup> |
|-----------------------------------------------|--------------|----|-----------|----|-----------|----|-----------|------------------|
|                                               |              | n  | Mean (SD) | n  | Mean (SD) | n  | Mean (SD) |                  |
| The Line Composite                            | Control      | 43 | 5.2 (2.1) | 38 | 4.6 (2.0) | 39 | 5.0 (2.4) | .23              |
|                                               | Per Protocol | 21 | 5.1 (2.0) | 21 | 5.4 (1.9) | 21 | 5.4 (1.7) |                  |
| The Line Communication Strategies             | Control      | 43 | 5.7 (2.6) | 38 | 4.9 (2.9) | 39 | 5.2 (3.0) | .13              |
|                                               | Per Protocol | 21 | 5.7 (2.6) | 21 | 6.3 (2.6) | 21 | 5.9 (2.6) |                  |
| The Line Emotional Coping                     | Control      | 43 | 5.1 (2.8) | 38 | 4.4 (2.9) | 39 | 4.6 (3.3) | .11              |
|                                               | Per Protocol | 21 | 5.2 (2.7) | 21 | 6.2 (2.6) | 21 | 5.2 (2.9) |                  |
| The Line Social Support                       | Control      | 43 | 5.2 (2.8) | 38 | 4.7 (2.9) | 39 | 4.9 (3.2) | .90              |
|                                               | Per Protocol | 21 | 5.5 (2.5) | 21 | 5.3 (3.0) | 21 | 5.6 (2.8) |                  |
| The Line Hearing Aids                         | Control      | 43 | 5.3 (2.7) | 38 | 5.4 (3.1) | 39 | 6.3 (3.0) | .26              |
|                                               | Per Protocol | 21 | 5.3 (2.6) | 21 | 5.4 (3.3) | 21 | 5.3 (2.5) |                  |
| The Line Assistive Listening Devices          | Control      | 43 | 4.5 (2.7) | 38 | 3.6 (3.1) | 39 | 4.0 (3.2) | <b>.049</b>      |
|                                               | Per Protocol | 21 | 3.7 (2.8) | 21 | 4.0 (2.6) | 21 | 5.0 (2.3) |                  |
| The Line Generic                              | Control      | 43 | 6.2 (2.2) | 38 | 6.0 (2.1) | 40 | 6.6 (2.2) | .13              |
|                                               | Per Protocol | 21 | 6.8 (2.0) | 21 | 6.3 (1.9) | 21 | 6.2 (1.7) |                  |
| Staging Algorithm Generic                     | Control      | 43 | 1.5 (0.7) | 38 | 1.5 (0.7) | 40 | 1.7 (0.9) | .37              |
|                                               | Per Protocol | 21 | 1.6 (0.8) | 21 | 1.7 (0.8) | 21 | 1.6 (0.7) |                  |
| Staging Algorithm Communication Strategies    | Control      | 43 | 1.2 (1.1) | 38 | 1.1 (1.2) | 39 | 1.0 (1.1) | .80              |
|                                               | Per Protocol | 21 | 1.9 (1.0) | 21 | 1.7 (1.3) | 21 | 1.7 (1.2) |                  |
| Staging Algorithm Emotional Coping            | Control      | 43 | 0.6 (1.0) | 38 | 0.5 (0.9) | 39 | 0.9 (1.2) | .26              |
|                                               | Per Protocol | 21 | 1.0 (1.2) | 21 | 1.2 (1.3) | 21 | 1.1 (1.3) |                  |
| Staging Algorithm Social Support              | Control      | 43 | 0.8 (1.0) | 38 | 0.8 (1.1) | 39 | 1.2 (1.3) | .55              |
|                                               | Per Protocol | 21 | 1.5 (1.3) | 21 | 1.5 (1.3) | 21 | 1.5 (1.3) |                  |
| Staging Algorithm Hearing Aids                | Control      | 43 | 1.1 (0.6) | 38 | 1.3 (0.8) | 39 | 1.5 (0.9) | <b>.049</b>      |
|                                               | Per Protocol | 21 | 1.3 (0.7) | 21 | 1.2 (0.8) | 21 | 1.1 (0.9) |                  |
| Staging Algorithm Assistive Listening Devices | Control      | 43 | 0.9 (0.8) | 38 | 0.7 (0.8) | 39 | 0.6 (0.8) | .38              |
|                                               | Per Protocol | 21 | 0.7 (0.7) | 21 | 0.8 (0.6) | 21 | 0.7 (0.7) |                  |
| PHS Self Management total                     | Control      | 43 | 6.0 (1.3) | 38 | 6.1 (1.2) | 39 | 6.3 (1.3) | .47              |
|                                               | Per Protocol | 21 | 6.1 (1.1) | 21 | 6.6 (0.9) | 21 | 6.8 (0.8) |                  |
| PHS Knowledge                                 | Control      | 43 | 5.4 (1.6) | 38 | 5.5 (1.7) | 39 | 5.9 (1.4) | .44              |
|                                               | Per Protocol | 21 | 5.5 (1.5) | 21 | 6.1 (1.1) | 21 | 6.5 (1.1) |                  |
| PHS Management of Symptoms                    | Control      | 43 | 5.8 (2.0) | 38 | 6.0 (1.9) | 39 | 6.3 (1.8) | .79              |
|                                               | Per Protocol | 21 | 6.0 (1.8) | 21 | 6.5 (1.6) | 21 | 6.9 (1.1) |                  |
| PHS Coping                                    | Control      | 43 | 6.7 (1.4) | 38 | 6.9 (1.3) | 39 | 6.6 (1.7) | .74              |
|                                               | Per Protocol | 21 | 7.0 (1.2) | 21 | 7.2 (0.8) | 21 | 7.1 (1.1) |                  |
| CPHI Maladaptive behaviors                    | Control      | 44 | 4.6 (0.4) | 40 | 4.6 (0.4) | 40 | 4.6 (0.4) | .78              |
|                                               | Per Protocol | 21 | 4.7 (0.3) | 21 | 4.6 (0.3) | 21 | 4.6 (0.3) |                  |
| CPHI Verbal Strategies                        | Control      | 44 | 2.3 (0.8) | 40 | 2.3 (0.9) | 40 | 2.3 (0.8) | <b>.03</b>       |
|                                               | Per Protocol | 21 | 2.2 (0.5) | 21 | 2.0 (0.4) | 21 | 2.4 (0.7) |                  |
| CPHI Non-Verbal Strategies                    | Control      | 44 | 2.9 (1.0) | 40 | 3.0 (1.0) | 40 | 3.0 (0.9) | .45              |
|                                               | Per Protocol | 21 | 3.1 (0.7) | 21 | 2.9 (0.7) | 21 | 3.1 (0.7) |                  |
| CPHI Self-Acceptance                          | Control      | 44 | 4.4 (0.7) | 40 | 4.4 (0.6) | 40 | 4.5 (0.5) | .54              |
|                                               | Per Protocol | 21 | 4.5 (0.7) | 21 | 4.6 (0.5) | 21 | 4.5 (0.7) |                  |

|                                              |              |    |             |    |             |    |             |     |
|----------------------------------------------|--------------|----|-------------|----|-------------|----|-------------|-----|
| CPHI Stress and Withdrawal                   | Control      | 44 | 4.0 (0.7)   | 39 | 4.1 (0.6)   | 40 | 4.0 (0.8)   | .72 |
|                                              | Per Protocol | 21 | 4.1 (0.5)   | 21 | 4.2 (0.6)   | 21 | 4.1 (0.6)   |     |
| SEHHS Self efficacy for hearing help seeking | Control      | 43 | 82.1 (17.2) | 38 | 83.2 (13.4) | 39 | 85.7 (10.0) | .52 |
|                                              | Per Protocol | 21 | 88.2 (15.3) | 21 | 86.2 (13.5) | 21 | 88.5 (13.4) |     |
| AQ Benefits                                  | Control      | 43 | 3.6 (0.5)   | 38 | 3.6 (0.4)   | 40 | 3.6 (0.5)   | .07 |
|                                              | Per Protocol | 21 | 3.7 (0.6)   | 21 | 3.5 (0.5)   | 21 | 3.4 (0.5)   |     |
| AQ Stigma                                    | Control      | 43 | 2.2 (0.9)   | 38 | 2.2 (0.8)   | 40 | 2.2 (0.7)   | .66 |
|                                              | Per Protocol | 21 | 2.5 (0.8)   | 21 | 2.4 (0.8)   | 21 | 2.3 (0.8)   |     |
| AQ Social Pressure                           | Control      | 43 | 3.0 (0.9)   | 38 | 3.0 (0.9)   | 40 | 3.1 (0.9)   | .08 |
|                                              | Per Protocol | 21 | 3.0 (0.7)   | 21 | 2.8 (0.7)   | 21 | 2.8 (0.8)   |     |
| AQ Evaluation of Hearing Aids by Others      | Control      | 43 | 2.4 (0.7)   | 38 | 2.3 (0.5)   | 40 | 2.3 (0.6)   | .28 |
|                                              | Per Protocol | 21 | 2.3 (0.8)   | 21 | 2.1 (0.7)   | 21 | 2.3 (0.9)   |     |
| AIADH Total                                  | Control      | 44 | 0.7 (0.5)   | 40 | 0.6 (0.4)   | 41 | 0.7 (0.5)   | .35 |
|                                              | Per Protocol | 21 | 0.7 (0.3)   | 21 | 0.7 (0.3)   | 21 | 0.7 (0.4)   |     |
| AIADH Distinction of Sounds                  | Control      | 44 | 0.5 (0.4)   | 40 | 0.4 (0.4)   | 41 | 0.5 (0.5)   | .53 |
|                                              | Per Protocol | 21 | 0.3 (0.3)   | 21 | 0.4 (0.3)   | 21 | 0.5 (0.5)   |     |
| AIADH Auditory Localization                  | Control      | 44 | 0.7 (0.6)   | 40 | 0.6 (0.6)   | 41 | 0.7 (0.6)   | .80 |
|                                              | Per Protocol | 21 | 0.6 (0.5)   | 21 | 0.6 (0.5)   | 21 | 0.6 (0.5)   |     |
| AIADH Intelligibility in Noise               | Control      | 44 | 1.2 (0.6)   | 40 | 1.1 (0.6)   | 41 | 1.2 (0.7)   | .05 |
|                                              | Per Protocol | 21 | 1.2 (0.5)   | 21 | 1.2 (0.5)   | 21 | 1.1 (0.5)   |     |
| AIADH Intelligibility in Quiet               | Control      | 44 | 0.8 (0.6)   | 40 | 0.8 (0.6)   | 41 | 0.8 (0.5)   | .18 |
|                                              | Per Protocol | 21 | 0.9 (0.4)   | 21 | 0.8 (0.3)   | 21 | 0.8 (0.5)   |     |
| AIADH Detection of Sounds                    | Control      | 44 | 0.6 (0.5)   | 40 | 0.5 (0.4)   | 41 | 0.6 (0.5)   | .11 |
|                                              | Per Protocol | 21 | 0.5 (0.3)   | 21 | 0.6 (0.3)   | 21 | 0.5 (0.3)   |     |

<sup>a</sup> p-value of the interaction between time and group.

SD = Standard deviation, LMM = Linear Mixed Model. AIADH = Amsterdam Inventory for Auditory Disability and Handicap, AQ = Attitude Questionnaire, CPHI = Communication Profile for the Hearing Impaired, PHHS = Prior Hearing Help-Seeking Steps, PHS = Partners in Health Scale, SEHHS = Self-Efficacy for Hearing Help-Seeking Scale,
